# Supplementary material for: A Notch/IL-21 signaling axis primes bone marrow T cell progenitor expansion
Source: JCI journal article supplement (doi:10.1172/jci.insight.157015), 2022-03-29
Supplement: sd1 [file 1]

You are being redirected.
